# Supplementary material for: Topical small molecule granzyme B inhibitor improves remodeling in a murine model of impaired burn wound healing
Source: PubMed Central journal article supplement (PMC5976625; doi:10.1038/s12276-018-0095-0), 2018-05-30
Supplement: 12276_2018_95_MOESM1_ESM.pdf [file 12276_2018_95_MOESM1_ESM.pdf]

## **Supplementary Information**

### **Topical Small-molecule Granzyme B Inhibitor Improves Remodeling in A Murine Model of Impaired Burn Wound Healing**

Running Title: Novel Therapy for Burn Injury and Impaired Healing

#### **Authors:**

Yue Shen<sup>1,2,3,6</sup>, Matthew R. Zeglinski<sup>1,2,3</sup>, Christopher T. Turner<sup>1,2,3</sup>, Sheetal A. Raithatha<sup>1,6</sup>, Zhengguo Wu<sup>4,5</sup>, Valerio Russo<sup>1,2,3</sup>, Cameron Oram<sup>1,2,3</sup>, Sho Hiroyasu<sup>2,3</sup>, Layla Nabai<sup>2,3</sup>, Hongyan Zhao<sup>1,2,3</sup>, Tatjana Bozin<sup>1</sup>, Kathryn Westendorf<sup>1,6</sup>, Irina Kopko<sup>7</sup>, Rachel Huang<sup>7</sup>, Steve Arns<sup>7</sup>, Jason Tan<sup>7</sup>, Haishan Zeng<sup>4,5</sup>, Anthony Boey<sup>7</sup>, Richard Liggins<sup>7</sup>, James Jaquith<sup>7</sup>, Dale R. Cameron<sup>6</sup>, Anthony Papp<sup>3</sup>, David J. Granville<sup>1,2,3,6\*</sup>

#### **Affiliations:**

<sup>1</sup>Centre for Heart Lung Innovation, St. Paul's Hospital, University of British Columbia, Vancouver, BC, Canada.

<sup>2</sup>International Collaboration On Repair Discoveries (ICORD), Vancouver Coastal Health Research Institute and Department of Pathology and Laboratory Medicine, University of British Columbia, Vancouver, BC, Canada.

<sup>3</sup>BC Professional Firefighters' Burn and Wound Healing Group, Vancouver, BC, Canada.

<sup>4</sup>Imaging Unit, Integrative Oncology Department, BC Cancer Agency Research Centre, Vancouver, BC, Canada.

<sup>5</sup>Photomedicine Institute, Department of Dermatology and Skin Science, University of British Columbia & Vancouver Coastal Health Research Institute, Vancouver, BC, Canada;

<sup>6</sup>viDA Therapeutics, Inc. Vancouver, BC, Canada

<sup>7</sup>Centre for Drug Research and Development, Vancouver, BC, Canada

\*To whom correspondence should be addressed:

David J Granville, ICORD Centre, Rm 4470, 818 West 10th Ave.

Vancouver, BC, V5Z 1M9, CANADA. Tel: +1-604-806-9267; Fax: +1-604-806-8351; Email. [dgranville@icord.org](mailto:dgranville@icord.org)

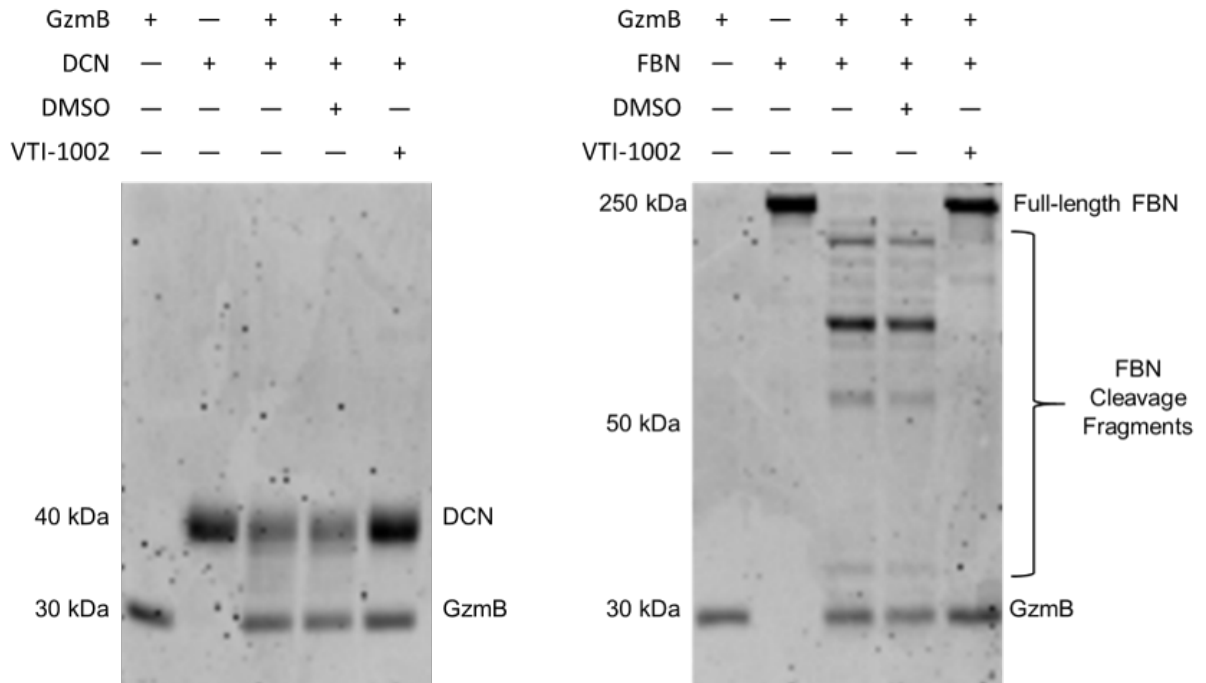

**Supplementary Figure 1. *In vitro* Characterization of VTI-1002 activity.** VTI-1002 abolishes GzmB-mediated ECM cleavage. (left) GzmB-mediated DCN cleavage assay; (right) GzmB-mediated FBN cleavage assay.

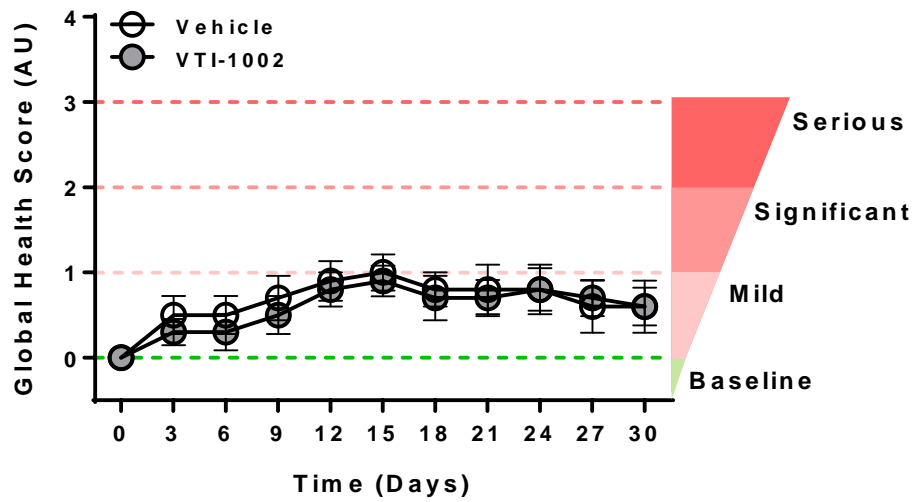

**Supplementary Figure 2. Topical VTI-1002 gel treatment does not affect global health.** Comparison of global health score over the 30-day healing period between vehicle control group and VTI-1002 treatment group (n = 10 per group). Global health score is the sum of scores of each health observation category (**Supp. Table 2**). Score 0 indicates the baseline health (normal); Score 1 indicates mild health impact; Score 2 indicates significant health impact; Score 3 indicates serious health impact (humane endpoint).

**Supplementary Table 1: Plasma level of VTI-1002 after topical application**

| <b>Time Point</b>     | <b>4 hrs</b> |          |          | <b>6 hrs</b> |          |          | <b>24 hrs</b> |          |          |
|-----------------------|--------------|----------|----------|--------------|----------|----------|---------------|----------|----------|
| <b>Sample #</b>       | <b>1</b>     | <b>2</b> | <b>3</b> | <b>4</b>     | <b>5</b> | <b>6</b> | <b>7</b>      | <b>8</b> | <b>9</b> |
| <b>Plasma (ng/mL)</b> | 1.6          | BLOQ     | BLOQ     | 7.6          | 7.4      | BLOQ     | ND            | BLOQ     | 3.4      |

BLOQ: Below the limit of quantitation (1 ng/mL in plasma)

ND: Not detected.

**Supplementary Table 2: Global Health Score Reference Chart**

| Health Observation Categories | Health Score                                                                             |                                                                                       |                                                                                                                                                        |                                                                                                                                                   |
|-------------------------------|------------------------------------------------------------------------------------------|---------------------------------------------------------------------------------------|--------------------------------------------------------------------------------------------------------------------------------------------------------|---------------------------------------------------------------------------------------------------------------------------------------------------|
|                               | 0<br>(Baseline health)                                                                   | 1<br>(Mild)                                                                           | 2<br>(Significant)                                                                                                                                     | 3<br>(Serious, Humane endpoint)                                                                                                                   |
| Body weight                   | ↓weight by 0-4%                                                                          | ↓weight by 5- 9%                                                                      | ↓weight by 10-14%                                                                                                                                      | ↓weight over 15%                                                                                                                                  |
| Wound site                    | Occasional scratching                                                                    | Redness or scaling                                                                    | Skin inflammation, drug-induced rash                                                                                                                   | Severe skin inflammation, ulceration                                                                                                              |
| Behavior                      | Intermittent stereotypic behaviour during cage changing; BAR (Bright, Alert, Responsive) | Slightly slow moving; still interested in environment; QAR (Quiet, Alert, Responsive) | Less interested in the environment, interacts less with cage mates, disregards observer; when nudged, reluctantly moves away. Occasional abnormal gait | Isolated from cage mates, minimally active; does not readily move when cage disturbed. When nudged reluctantly moves. Limping or “tip-toed” gait. |
| Dehydration                   | N/A                                                                                      | Mildly sunken eyes (appear >75% open).                                                | Skin tent > 2 seconds (decrease in skin elasticity). Sunken eyes (appear half closed).                                                                 | Skin tent > 5 seconds. Completely closed or severely sunken eyes; tail feels square. Cool to touch.                                               |
| Elimination (Feces, Urine)    | Soft but formed feces, hydration normal                                                  | Daily paste-like feces, hydration normal                                              | Daily watery diarrhea, occasionally formed, soft feces, increased urine output. Small area of fecal anus staining, urine scalding. Hydration normal    | Watery diarrhea or increased urination resulting in dehydration; larger area of fecal staining, urine scalding, fecal smearing on walls           |
| Respiration                   | Occasional increased rate                                                                | Subtle change in rate or effort                                                       | Obvious change in rate or effort                                                                                                                       | Reduced rate, irregular rhythm;                                                                                                                   |

|      |                                                |                                                     |                                                                                                                                                                                                                                                                                                |                                                                                                                    |
|------|------------------------------------------------|-----------------------------------------------------|------------------------------------------------------------------------------------------------------------------------------------------------------------------------------------------------------------------------------------------------------------------------------------------------|--------------------------------------------------------------------------------------------------------------------|
|      | after activity;<br>normal rhythm<br>and effort | with activity;<br>normal at rest;<br>regular rhythm | with activity and<br>at rest;<br>occasional<br>irregular rhythm;<br>small amount of<br>nasal discharge,<br>sneezing                                                                                                                                                                            | requires effort to<br>breathe (abdominal<br>effort); noisy<br>breathing; nasal<br>discharge affecting<br>breathing |
| Pain | None                                           | N/A                                                 | Facial grimace:<br>narrow or closed<br>eyes, bulge on<br>top of nose,<br>cheek bulge,<br>ears back or flat,<br>whiskers<br>pointing back or<br>“standing out on<br>end”<br>Other: muscle<br>twitching or<br>flinching,<br>staggering, back<br>stretch,<br>abdominal<br>writhing or<br>pressing | Persistent signs of<br>pain that interfere<br>with normal<br>functions or cannot<br>be alleviated                  |
